# Supplementary material
Source: HighWire-hosted journal article supplement (http://www.jneurosci.org/highwire/filestream/601540/field_highwire_adjunct_files/0/Supplemental_Material.pdf)
Supplement: Supplemental_Material.pdf [file Supplemental_Material.pdf]

## Supplemental Material

**Supplementary Table 1.** Hearing loss variability among DBA-related inbred strain mice. Average ABR thresholds, standard errors, and sample sizes are given for each strain-age combination tested.

| Strain      | Age tested weeks | number | Average ABR thresholds and standard errors |     |       |      |        |      |        |     |
|-------------|------------------|--------|--------------------------------------------|-----|-------|------|--------|------|--------|-----|
|             |                  |        | click                                      |     | 8 kHz |      | 16 kHz |      | 32 kHz |     |
|             |                  |        | AVG                                        | SE  | AVG   | SE   | AVG    | SE   | AVG    | SE  |
| DBA/1J      | 12               | 3      | 48                                         | 1.7 | 43    | 1.7  | 28     | 1.7  | 60     | 0.0 |
| DBA/1J      | 48               | 5      | 57                                         | 2.0 | 40    | 2.8  | 42     | 7.6  | 59     | 7.4 |
| DBA/2HaSmnJ | 6.5              | 4      | 39                                         | 1.3 | 30    | 2.1  | 19     | 1.3  | 51     | 2.4 |
| DBA/2HaSmnJ | 14               | 5      | 36                                         | 1.0 | 26    | 2.5  | 22     | 1.2  | 45     | 1.6 |
| DBA/2HaSmnJ | 16               | 2      | 35                                         | 0.0 | 30    | 0.0  | 25     | 0.0  | 43     | 2.8 |
| DBA/2DeJ    | 7.5              | 1      | 50                                         | —   | 50    | —    | 20     | —    | 85     | —   |
| DBA/2DeJ    | 15               | 2      | 50                                         | 5.0 | 50    | 0.0  | 33     | 2.5  | 88     | 2.5 |
| DBA/2DeJ    | 17               | 1      | 50                                         | —   | 50    | —    | 35     | —    | 95     | —   |
| DBA/2DeJ    | 28               | 5      | 55                                         | 4.0 | 49    | 6.3  | 53     | 12.1 | 98     | 1.3 |
| DBA/2NCrI   | 4                | 3      | 40                                         | 0.0 | 42    | 6.0  | 17     | 4.4  | 78     | 1.7 |
| DBA/2NCrI   | 7.5              | 3      | 47                                         | 4.4 | 43    | 1.7  | 18     | 3.3  | 82     | 4.4 |
| DBA/2NCrI   | 14               | 4      | 48                                         | 4.8 | 41    | 4.3  | 36     | 5.1  | 94     | 2.4 |
| DBA/2NCrI   | 17               | 4      | 44                                         | 2.4 | 43    | 3.3  | 39     | 7.4  | 84     | 2.4 |
| DBA/2NCrI   | 21               | 4      | 51                                         | 1.3 | 43    | 1.5  | 45     | 6.5  | 95     | 2.1 |
| DBA/2NCrI   | 26               | 4      | 54                                         | 4.3 | 44    | 4.3  | 73     | 9.3  | 95     | 2.9 |
| DBA/2J      | 3.5              | 6      | 43                                         | 1.7 | 28    | 1.7  | 28     | 7.1  | 53     | 4.8 |
| DBA/2J      | 5.0              | 7      | 60                                         | 4.3 | 44    | 3.5  | 53     | 5.7  | 74     | 5.9 |
| DBA/2J      | 8.0              | 5      | 55                                         | 3.5 | 46    | 4.0  | 62     | 4.3  | 67     | 5.1 |
| DBA/2J      | 12.0             | 10     | 67                                         | 3.3 | 50    | 4.1  | 65     | 2.3  | 72     | 3.8 |
| DBA/2J      | 17.0             | 2      | 73                                         | 7.5 | 80    | 10.0 | 70     | 5.0  | 90     | 0.0 |
| DBA/2J      | 23.0             | 4      | 90                                         | 5.4 | 89    | 9.7  | 91     | 5.6  | 100    | 0.0 |
| DBA/2J      | 28.0             | 7      | 97                                         | 2.9 | 95    | 2.7  | 92     | 3.9  | 100    | 0.7 |

a

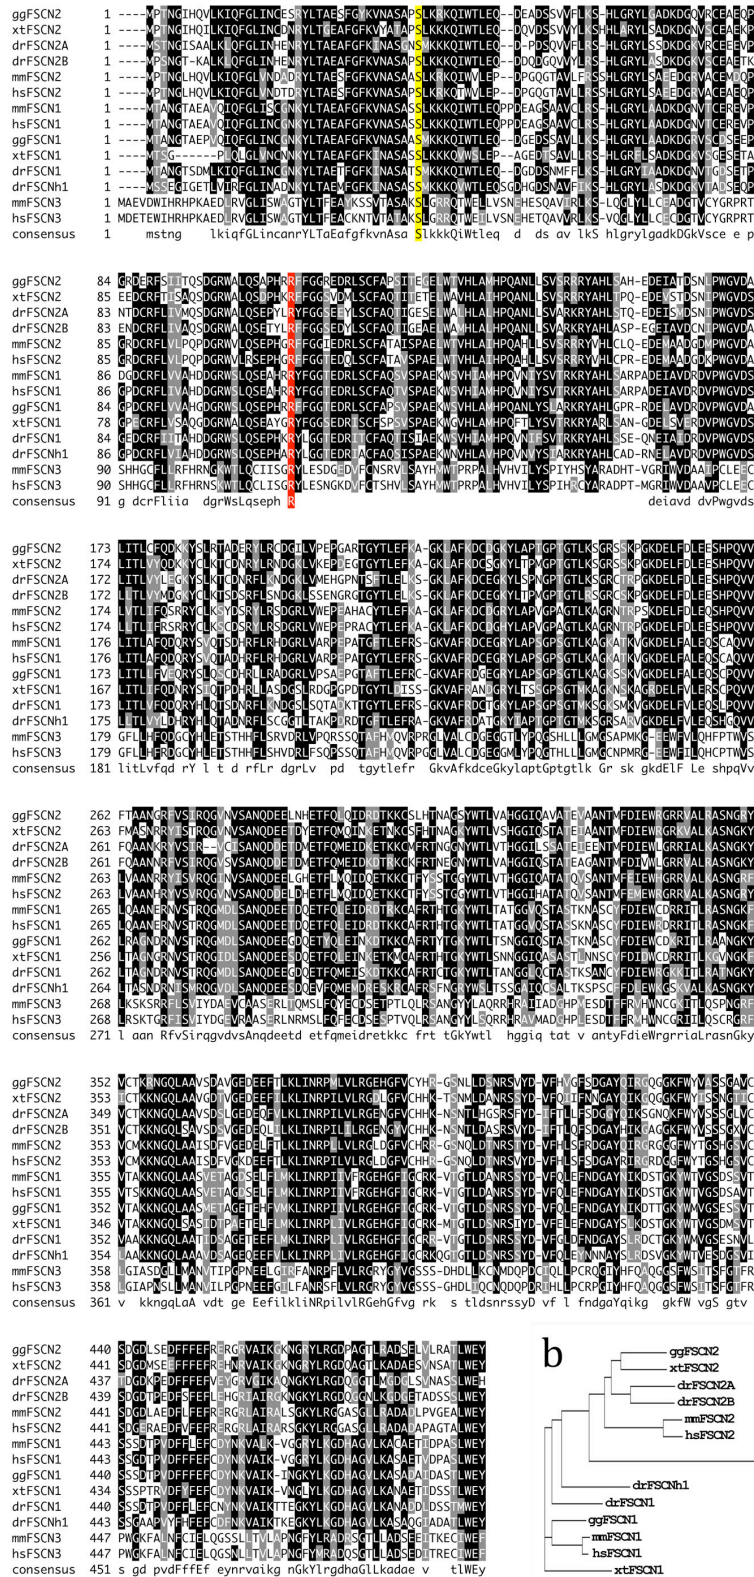

**Suppl. Fig. 1.** Fascin sequences are highly homologous across species. **a.** Multiple protein sequence alignments done in ClustalW2. Serine 39, which is a regulatory phosphorylation site, is highlighted in yellow. Arginine 109, which is mutated to a histidine in DBA/2J mice, is highlighted in red. **b.** Phylogenetic tree of fascin genes. Branch lengths are proportional to the amount of evolutionary distance between related genes.

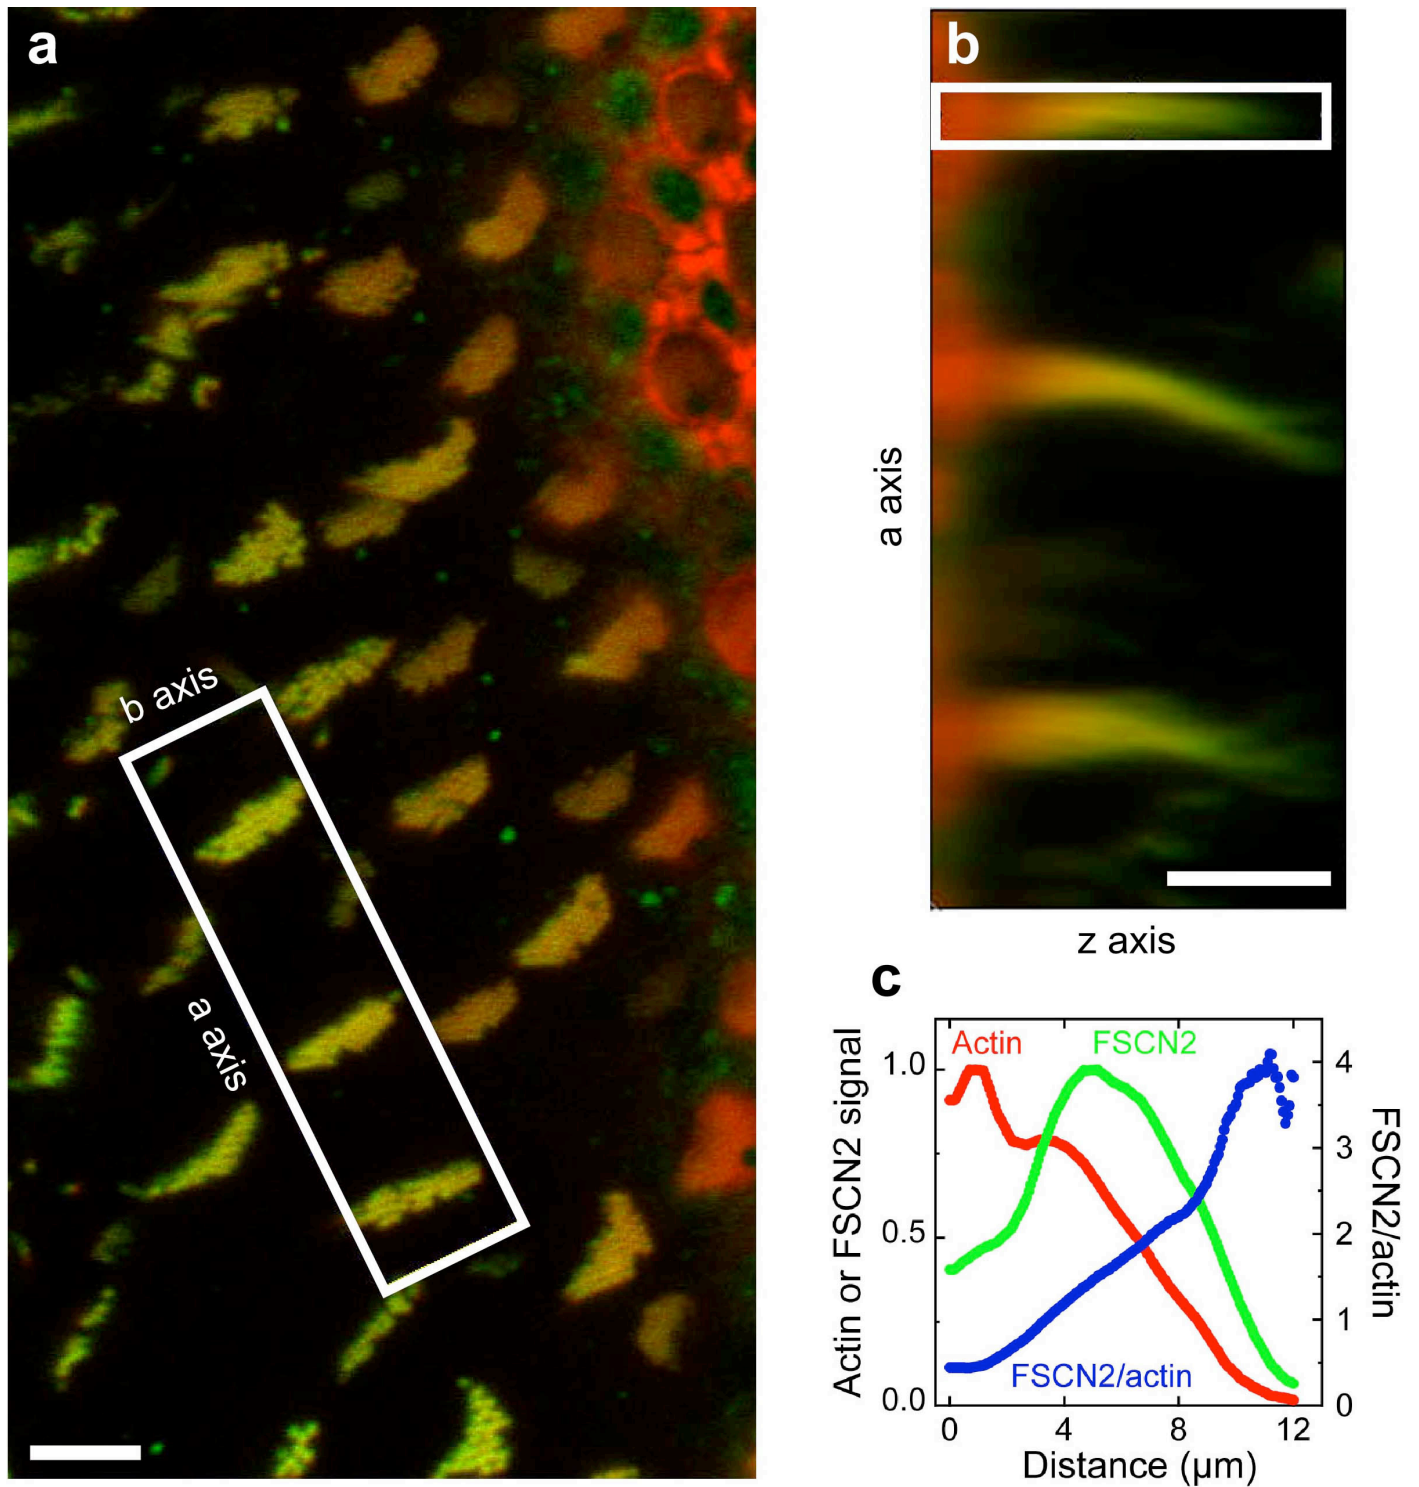

**Suppl. Fig. 2.** FSCN2 concentration towards tips in P10 mouse utricle hair bundles. Using ImageJ, an a-b-z stack was generated from a confocal stack of bundles labeled with anti-FSCN2 (a single slice of that stack is shown in **a**, with the area used for the a-b-z stack indicated with a box). That stack was flattened along the b-axis using average z-projection in ImageJ, generating the image in **b**. Using the Plot Profile function in ImageJ, profiles of red (actin) and green (FSCN2) fluorescence were generated. These profiles and the FSCN2/actin ratio were plotted in **c**. Note that the FSCN2/actin ratio is highest in the last  $\sim 3 \mu\text{m}$  of the hair bundle. Similar profiles were observed in other hair bundles.
